# Supplementary material for: Fate of microplastics and other small anthropogenic litter (SAL) in wastewater treatment plants depends on unit processes employed
Source: Royal Society of Chemistry journal article supplement (doi:10.1039/c6ew00207b), 2016-01-01
Supplement: c6ew00207b1.pdf [file c6ew00207b1.pdf]

## Electronic Supplementary Information

### Fate of microplastics and other small anthropogenic litter (SAL) in wastewater treatment plants depends on unit processes employed

Marlies R. Michielssen,<sup>a,b</sup> Elien R. Michielssen,<sup>a,b</sup> Jonathan Ni,<sup>a,c</sup> and Melissa B. Duhaime<sup>d\*</sup>

<sup>a</sup> Department of Civil and Environmental Engineering, University of Michigan, 2350 Hayward Road, Ann Arbor, MI 48109, USA.

<sup>b</sup> Washtenaw International High School, 510 Emerick Street, Ypsilanti, MI 48198, USA.

<sup>c</sup> Detroit Country Day School, 22400 Hilview Lane, Beverly Hills, MI 48025, USA.

<sup>d</sup> Department of Ecology and Evolutionary Biology, University of Michigan, 830 North University Avenue, Ann Arbor, MI 48109, USA.

Submitted to: *Environmental Science: Water Research & Technology*

\*corresponding author: [duhaimem@umich.edu](mailto:duhaimem@umich.edu) / 734-764-6219

#### Size Class Distribution

During sample sieving, most data from each of the sieve size fractions were combined with the exception of Northfield WWTP fall sampling, whose size class distribution was recorded (Figure S1). This distribution was used to calculate the weighted arithmetic mean length of plastic leaving a treatment plant—a value used to finally estimate the mass of plastic fibers leaving the Detroit plant.

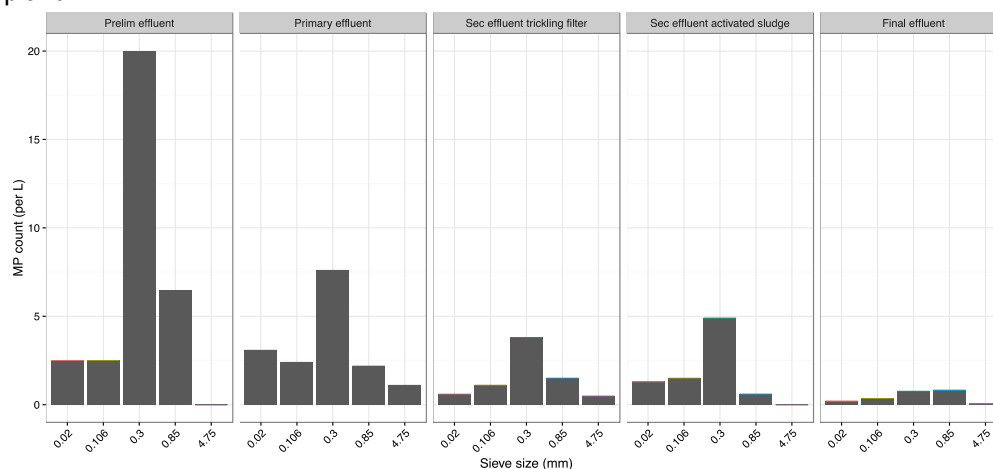

**Figure S1.** Comparison of MP size class distribution across the five unit processes at the Northfield WWTP in fall (19 October 2015).

#### Raw Data, Code for Figures, and Calculations

All raw count data, R code for figures and calculations are made freely available in the following github repository: [https://github.com/ecogenomix/WWTP\\_MPs\\_study\\_Michielssen\\_et\\_al](https://github.com/ecogenomix/WWTP_MPs_study_Michielssen_et_al).

Further, the code and calculations are available at the following URL (source html file is also available in the github repository): [http://www-personal.umich.edu/~duhaimem/Rpubs\\_code/WWTP\\_MPs\\_study\\_Michielssen\\_et\\_al.html](http://www-personal.umich.edu/~duhaimem/Rpubs_code/WWTP_MPs_study_Michielssen_et_al.html)
